# Supplementary material for: Temporal Progression of Pneumonic Plague in Blood of Nonhuman Primate: A Transcriptomic Analysis
Source: PLoS One. 2016 Mar 22;11(3):e0151788. doi: 10.1371/journal.pone.0151788 (PMC4803270; doi:10.1371/journal.pone.0151788)
Supplement: S4 Table — This is the list of genes identified by contrasting all the post-exposure samples (irrespective of time of infection) vs. the respective controls (bloods drawn before the aerosol challenge). The values are in log2(fold change). (XLSX) [file pone.0151788.s009.xlsx]

## Sheet: Table S4
S4 Table. The GoI-Inf regulation profile. This is the list of genes identified by contrasting all the treated samples (irrespective of time of infection) vs. the respective controls (bloods drawn before the aerosol challenge). The values are in log2(fold change).
Symbol	Log FC
ABCA3	0.294885
ABCB6	-0.487879
ABCC12	-0.722707
ABCC2	0.376219
ABCE1	0.282635
ABHD13	0.619516
ACADS	0.189139
ACP6	0.227372
ACSM3	0.595329
ACTL7B	0.519625
ACTR6	0.397445
ACYP2	0.506547
ADAMTS12	0.40172
ADAMTS13	0.329429
ADAMTSL3	-0.312537
ADRB2	-0.425562
AKAP13	-0.315891
AKAP7	0.302429
AKAP9	-0.751192
ALDH1L1	0.292212
ALDH2	-0.263405
ALDH5A1	0.380163
ALDH8A1	0.517715
ALG13	0.475288
ALG6	0.373761
ALOX5	-0.40476
ALS2	0.376511
AMHR2	0.50564
AMMECR1	0.272519
AMZ2	0.346491
ANAPC10	0.432767
ANKMY2	0.337394
ANKRD12	0.557038
ANKRD16	0.623983
ANKRD37	-0.468941
AOC2	-0.614707
AOC3	-0.407739
AP1M1	-0.246935
APC2	-0.427821
APOOL	0.616391
AQP7	-0.253086
AR	0.361706
ARG1	0.357002
ARHGAP12	0.519789
ARHGEF19	0.208096
ARID4A	0.360371
ARID4B	0.386224
ARMC2	0.427887
ARV1	0.392143
ASAHL	-0.453562
ASPH	0.531718
ASPH	0.391415
ATF7IP	0.665785
ATG2A	0.269538
ATP2B1	0.285346
ATP6V1G3	-0.435195
ATP8A1	-0.236988
ATP8B2	-0.54924
ATPBD1C	0.320407
ATR	0.371093
ATRX	0.354151
B3GALT6	0.317799
BAG2	0.349888
BCAP29	-0.443395
BCAS2	0.461879
BCKDHB	0.322358
BDP1	0.494473
BET1L	0.260026
BFSP2	-0.59557
BIRC4	0.674484
BIVM	0.456466
BNIP1	0.256661
BOLA3	0.300357
BRD7	0.385677
BRPF1	-0.340486
BRWD1	0.821025
BTLA	0.496692
BTN3A1	0.461162
BXDC2	0.415583
C10orf116	0.396265
C10orf67	0.330737
C10orf78	0.574636
C10orf88	0.510422
C11orf48	0.246953
C11orf49	0.312172
C11orf66	-0.34378
C11orf73	0.366134
C12orf29	0.612986
C12orf30	0.307807
C12orf35	0.385607
C12orf35	0.524169
C12orf4	0.325296
C12orf45	0.342345
C12orf59	-0.42637
C12orf63	-0.323774
C13orf16	0.454453
C14orf1	-0.355788
C14orf108	0.44409
C14orf129	-0.456562
C14orf138	0.489107
C14orf140	0.542385
C14orf83	0.30331
C15orf37	0.295418
C16orf65	-0.566286
C17orf61	0.387833
C17orf65	-0.449245
C18orf21	0.32453
C18orf25	0.399618
C19orf12	-0.517067
C1D	0.347412
C1orf156	0.533408
C1orf21	-0.271256
C1orf25	0.442151
C1orf41	0.544259
C1orf66	-0.285007
C1orf89	0.437536
C21orf13	0.297754
C22orf36	0.467744
C2orf47	0.307923
C3H21orf91	0.358194
C3orf1	0.297161
C3orf23	0.365132
C3orf26	0.462158
C3orf58	0.314283
C4orf27	0.338734
C6orf118	-0.496346
C7orf20	0.298898
C7orf24	0.532292
C7orf34	-0.36989
C7orf46	0.501395
C8orf4	0.335513
C8orf53	0.35759
C8orf59	0.551714
C9orf10OS	-0.509779
CA13	-0.37282
CACNA1E	-0.370485
CACNB3	0.358329
CACNG5	-0.379112
CADM1	0.461315
CALM3	-0.631081
CAMK1D	-0.44274
CAMK2D	0.301554
CAMTA1	0.523641
CAND1	0.255696
CAPNS1	-0.393641
CAPRIN2	0.315604
CATSPER1	-0.587432
CAV1	-0.574628
CBFA2T2	0.245964
CCAR1	0.373782
CCDC106	0.484937
CCDC131	0.340594
CCDC24	0.263346
CCDC41	0.446699
CCDC42	-0.386082
CCDC46	0.44114
CCDC5	0.645743
CCDC60	-0.478091
CCDC76	0.537502
CCDC90B	0.322203
CCDC92	0.515215
CCDC98	0.47733
CCL14	-0.238715
CCL3L3	0.377182
CCNC	0.516119
CCND3	-0.256422
CCNJ	0.572201
CCNL1	0.399606
CCNT2	0.325572
CCNT2	0.420243
CD22	-0.521149
CD47	0.572548
CDC16	0.303022
CDC37L1	0.358611
CDC45L	-0.297477
CDC7	0.423345
CDCA4	0.279286
CDK5RAP1	0.24559
CDK6	0.404366
CDKAL1	-0.480597
CDKN2AIP	0.409105
CDKN3	0.659626
CDR2L	-0.322838
CEACAM4	-0.641809
CENPE	0.567505
CENPK	0.596176
CENTB5	-0.35172
CEP110	0.346947
CEP170	0.233893
CEP192	0.493339
CEP290	0.56885
CEP57	0.222375
CEP63	0.347031
CEP70	0.838272
CETN3	0.665052
CFL2	0.494801
CGRRF1	0.482902
CHCHD6	0.276285
CHCHD7	0.448445
CHCHD8	0.317954
CHD6	0.490003
CHEK2	0.500324
CHRNA10	-0.34201
CHST14	0.448467
CHSY1	0.432361
CHUK	0.406246
CIAPIN1	0.232872
CISD1	0.364147
CKB	-0.341942
CKLF	0.44005
CLCN6	0.37732
CLMN	0.415318
CLN5	0.284516
CLYBL	0.339309
CMTM8	0.739301
CNIH3	-0.635181
CNPY2	0.323391
COASY	0.238972
COG6	0.32935
COL17A1	0.500127
COL4A6	-0.472509
COL5A1	-0.376803
COMMD6	0.48446
COPA	-0.383501
COPS5	0.254923
COPZ1	0.359327
COQ3	0.506333
COQ5	0.302069
CORO1C	-0.451007
COX6C	0.577046
COX7B	0.512397
CPA5	-0.305219
CPSF2	-0.426089
CRKL	-0.433829
CROP	0.360391
CROP	0.38865
CRYZL1	-0.283986
CSNK1G3	0.290674
CSTF3	0.375029
CTDSP2	-0.282519
CTDSPL2	0.37451
CTPS	0.377066
CTPS2	-0.559401
CTTNBP2NL	-0.370859
CUBN	0.434071
CXCL16	-0.665861
CXorf23	0.357992
CYB561D2	0.18478
CYP20A1	0.602118
CYP7B1	-0.362861
DARC	-0.363895
DCDC1	-0.262521
DCP2	0.32902
DCST1	-0.376842
DCT	-0.413258
DCTN6	0.450659
DCUN1D5	0.322004
DDIT3	0.303128
DDX3Y	0.267294
DDX53	-0.426497
DEAF1	0.470077
DENND1A	-0.414879
DENR	0.663877
DEPDC6	-0.722842
DFNB31	-0.314863
DHX36	0.293583
DICER1	0.326612
DIDO1	0.463733
DIO1	0.29834
DKFZP564O0823	0.39925
DMXL1	0.606915
DNAI1	-0.383852
DNAJB1	-0.537792
DNAJB14	0.603093
DNAJC10	0.642555
DNAJC5B	-0.368
DNTT	-0.280475
DOCK9	0.291226
DOPEY1	0.355764
DPH2	0.324492
DPP6	-0.428736
DPP8	0.337695
DPY19L4	0.295112
DQX1	-0.461659
DSCR3	-0.509566
DTWD2	0.394528
DUSP12	0.443005
DUT	0.312616
DYNC2LI1	0.579456
E2F1	-0.291577
E2F6	-0.340925
EAF2	0.54718
EBAG9	0.322897
EBNA1BP2	0.567446
ECHDC2	0.276888
ECM1	-0.305264
ECT2	0.522196
EDEM3	0.319249
EEF1E1	0.699806
EFCAB2	0.534545
EHD1	-0.356474
EHD3	-0.506583
EID3	0.579804
EIF1AX	0.451062
EIF3B	-0.372772
EIF3E	0.472906
EIF4ENIF1	0.448498
EIF4G3	0.423851
ELA1	0.700705
ELF2	0.315126
ELL2	-0.468292
ELP2	0.247652
EMD	-0.211737
EME1	0.365573
EML1	-0.312608
EN1	0.392118
ENPP4	0.537231
ENPP5	0.543366
ENPP6	-0.415376
EPB41L2	-0.302725
EREG	-0.511045
ERGIC1	0.443947
ESF1	0.486565
ETAA1	0.434533
ETFB	0.238072
ETFDH	0.612859
EXOC1	0.347317
EXOC2	0.357287
EXOC3L2	-0.522376
EXOC8	0.364726
EXOSC4	0.200713
EXOSC9	0.361896
F8A1	-0.401626
FABP4	0.752762
FADS2	-0.338152
FAHD2A	0.253576
FAIM	0.569689
FAM113A	0.233321
FAM116A	0.328926
FAM122B	0.362653
FAM122C	0.346258
FAM123C	-0.398344
FAM124B	-0.740313
FAM134B	0.434347
FAM136A	0.360644
FAM149A	0.362764
FAM18B	0.475396
FAM29A	0.476267
FAM43A	-0.391985
FAM44A	0.643044
FAM76B	0.439281
FAM82B	0.571179
FAM82C	-0.458393
FAM83A	-0.292408
FAM98A	-0.31847
FBXL21	-0.625966
FBXO10	0.377934
FBXO24	0.449492
FBXO4	-0.348947
FBXW7	0.248967
FCER2	-0.471453
FCHSD2	0.296005
FGFR1OP	-0.363893
FGFR1OP2	0.341074
FGFR2	0.484703
FKBP14	-0.550275
FKBP1A	-0.455116
FKBP1A	-0.379546
FKHL18	-0.453786
FLJ13611	0.657489
FLJ20309	0.524466
FLJ20323	0.389836
FLJ22167	0.398552
FLJ37357	0.208949
FLJ38973	-0.411291
FLJ45530	-0.301729
FLYWCH2	0.331298
FMR1	0.540524
FNBP1L	0.500276
FNDC3A	0.371245
FNIP1	0.296623
FOLH1	-0.578742
FOXP1	0.387693
FSTL3	-0.230138
FUNDC1	0.570004
FYCO1	0.373711
GABARAPL1	-0.541833
GAD1	-0.537459
GALE	0.308671
GALNT4	0.358452
GANC	-0.354429
GCNT4	-0.393389
GEMIN8	-0.365578
GEN1	0.632211
GFRA1	-0.556089
GIN1	0.64554
GLMN	-0.614375
GMNN	0.396542
GMPS	0.357407
GNL3	0.495427
GNPDA1	-0.286837
GOLGA4	0.305341
GOPC	0.362443
GPR62	-0.526036
GPSM1	0.423555
GRM3	0.493675
GSTA4	-0.36959
GTF2F2	0.365802
GTPBP10	-0.351239
GZMM	0.457457
H19	-0.545681
H2AFY	0.370981
HBXIP	0.299381
HDDC2	-0.361853
HEATR2	-0.540668
HEL308	-0.39982
HERC3	0.451985
HIGD1A	0.426604
HINT1	0.466817
HISPPD1	0.467951
HIST1H1B	0.463485
HIST1H1E	0.464545
HIST1H1T	0.334202
HIST1H4G	0.487613
HK3	-0.318601
HLA-DOB	0.588423
HLA-DPB1	-0.466787
HLA-DRB1	-0.385087
HMGB3	-0.614395
HNRPH1	0.289155
HSF2	0.423425
HSPA14	0.56741
HSPA1A	-0.650035
HSPA2	-0.48264
HSPC111	0.223506
HSPC171	0.44099
HTF9C	0.228941
HTR2B	-0.374092
HTR7	-0.401988
ICAM2	0.271192
IER5	-0.431495
IFNA2	0.283323
IFNA6	0.514428
IFNG	0.464434
IFT57	-0.437963
IFT80	0.610964
IFT88	0.425727
IGF1	-0.582278
IGSF1	-0.592328
IKIP	0.469092
IKZF5	0.396804
IL12B	-0.340583
IL17A	0.32839
IL17B	-0.523545
IL28RA	-0.334862
IL5RA	0.398975
IL6	0.332812
IL7	0.486765
ILDR1	0.722202
ILKAP	0.320185
IMMP1L	0.678725
IMP4	0.23118
INA	-0.331193
INPP5E	0.468652
INPPL1	0.226027
INSL4	-0.498337
INTS2	0.392179
IQCC	0.291088
ITFG2	0.319959
ITFG3	-0.341364
ITGA6	0.378685
ITGA8	0.427497
ITGB3BP	0.327289
ITIH2	0.306468
ITPA	0.290057
ITPKC	0.32768
JARID1C	-0.300696
JMJD1C	0.316958
JUNB	-0.571935
KATNB1	0.19509
KBTBD8	0.357063
KIAA0020	0.318771
KIAA0247	-0.441957
KIAA0776	0.551551
KIAA1576	-0.355798
KIAA1754L	0.327142
KIAA1841	-0.508711
KIF9	-0.404909
KLF10	0.420542
KLHDC5	-0.348392
KLHL14	0.63824
KLHL20	0.483676
KLHL23	0.324873
KLHL24	0.273287
KLHL5	0.501874
KLHL5	0.422826
KLK4	-0.333174
KLRC3	0.652774
KRIT1	-0.313127
KRT18	0.259747
KRTAP11-1	-0.371418
KRTAP19-3	-0.424057
KTN1	0.335799
L3MBTL3	0.369695
LACE1	0.298125
LANCL1	0.40034
LARP2	0.50459
LARP7	0.446342
LAS1L	0.315611
LBR	0.31061
LEMD2	-0.204455
LHPP	0.250945
LIG1	0.286313
LIMK1	0.518282
LIN7B	0.245763
LMAN1	0.399093
LOC100423269	-0.405812
LOC144097	-0.333378
LOC153364	0.686329
LOC283666	0.73322
LOC399947	-0.437531
LOC401565	0.614657
LOC402573	-0.802187
LOC440607	-0.439241
LOC51233	0.391771
LOC693798	0.420464
LOC694102	0.343612
LOC694888	0.415836
LOC694929	0.365397
LOC695784	0.464013
LOC696389	0.451925
LOC696505	0.297953
LOC696612	0.257682
LOC696612	0.244118
LOC696925	0.594005
LOC696964	0.428422
LOC698524	-0.29569
LOC699327	0.400574
LOC701729	0.367984
LOC702054	0.312728
LOC703831	-0.223626
LOC706154	0.533934
LOC706500	0.310822
LOC708200	-0.369275
LOC709436	0.376339
LOC710344	0.430258
LOC710700	0.348197
LOC711108	0.66425
LOC711321	0.492858
LOC711376	0.520103
LOC711961	0.497373
LOC712392	0.418371
LOC712606	0.422211
LOC712606	0.41555
LOC714279	0.358722
LOC714678	-0.215914
LOC714940	0.394767
LOC715976	0.524008
LOC717335	-0.4082
LOC718519	-0.343811
LOC718775	0.576388
LOC719394	0.323778
LOC720001	-0.427113
LOC722762	-0.395772
LONRF1	0.294429
LOXL1	0.308816
LPIN1	0.3141
LRP12	-0.620909
LRP4	-0.42392
LRRC29	0.328884
LRRC3B	-0.476939
LRRC40	0.840347
LRRC43	0.455723
LRTM1	-0.595266
LSM1	0.310826
LSM14A	-0.34802
LSM2	0.396628
LSM5	0.401783
LY6G6C	-0.304412
LY6K	-0.312659
LY75	0.743952
LY96	0.738233
LYPD5	-0.400504
LYRM4	-0.54862
MACMULV1R-PS1045	-0.623234
MACROD2	-0.466981
MAGEB2	-0.556355
MAGEF1	0.271311
MANBAL	0.420061
MAP2K5	0.388632
MAP3K7	0.508342
MAP3K7IP3	-0.459524
MAPKAP1	-0.322578
MAPRE3	-0.241377
MATN1	-0.463909
MCART1	-0.334152
MDGA1	1.12172
MDM2	-0.446223
MDM4	0.40168
MDN1	0.358615
MED11	0.345717
MED23	0.310743
MED30	0.36422
MED7	0.423948
METTL2A	-0.399364
METTL6	0.476681
MGC13379	0.373533
MGC24975	-0.329385
MGC61571	0.527558
MGC70857	0.28055
MITD1	-0.62876
MKLN1	0.433926
MLH3	-0.524874
MLLT1	-0.413604
MLLT10	0.348346
MMD	0.546517
MNS1	-0.289115
MOBKL2B	-0.787238
MOCS2	0.276569
MRGPRX1	-0.392082
MRP63	0.546744
MRPL13	0.442842
MRPL15	0.323603
MRPL27	0.167887
MRPL32	0.365158
MRPL33	0.424031
MRPL46	0.365895
MRPL55	0.196584
MRPS11	0.447203
MRPS11	0.26133
MRPS18A	0.305408
MRPS21	0.288802
MRPS28	0.486875
MRPS9	0.241579
MSTO1	0.46416
MT1E	0.316337
MTERFD1	0.521139
MTF2	0.301271
MUC2	-0.391584
MUC4	-0.744878
MYBPC1	-0.427704
MYNN	0.505203
N6AMT2	-0.368753
NAP1L4	0.265481
NAPA	-0.289245
NCAPH	0.316201
NCR1	0.455319
NDC80	0.48885
NDUFA12L	0.441987
NDUFA4L2	0.288673
NDUFA5	0.293715
NDUFA6	0.219774
NDUFAF1	0.249021
NDUFB1	0.320919
NDUFB6	0.404475
NDUFC1	-0.439011
NDUFS4	0.387382
NEDD1	0.534491
NEDD4	0.412214
NEFL	0.436844
NEK1	0.390947
NEK3	0.400137
NEK7	-0.36115
NEK7	0.38876
NEK7	0.319931
NEK9	-0.416206
NET1	0.351691
NFU1	0.461892
NFX1	0.385083
NFYB	0.568472
NGFRAP1	0.340048
NICN1	0.497005
NIF3L1	0.33415
NIN	0.337747
NIT2	0.306783
NKAPL	-0.443364
NKRF	0.416784
NLRC4	-0.564756
NMD3	0.502858
NOL11	0.321306
NOLC1	-0.34747
NPAS3	0.34116
NPHS2	0.523722
NPM2	-0.591859
NPM3	0.411772
NPPC	0.334594
NR2C1	0.345928
NRIP1	0.43594
NRIP3	0.308326
NSMAF	0.329244
NSMCE4A	0.322254
NSUN5	0.274253
NUCB2	-0.273732
NUDCD1	0.519863
NUDCD2	0.486902
NUDT12	0.610697
NUDT13	0.404245
NUDT16L1	0.250131
NUDT2	0.227631
NUDT4	-0.241248
NUMBL	0.486086
NUP107	0.506428
NUP153	0.357607
NUP155	0.374833
NUP85	0.276509
NUPL1	0.656592
NXF5	-0.458851
NXNL1	0.303137
NYX	-0.414679
OGG1	-0.23828
OLFM4	-0.426388
OLIG2	-0.496264
OPTN	0.427529
OR10T2	-0.283216
OR1J1	0.324276
OR2A25	-0.59177
OR2A4	-0.311042
OR2L13	0.419543
OR2T12	-0.367732
OR4M2	-0.418861
OR51A7	-0.259668
OR52A1	-0.3589
OR52N1	-0.460459
OR5AC2	0.314143
OR5P3	-0.278987
OR5W2	-0.527781
OR9I1	-0.383837
OSBPL5	0.359429
OSBPL7	0.305489
OSBPL8	0.517229
OSGEP	0.362366
OSMR	-0.455206
OTP	-0.446603
OTUB1	-0.326552
OTUD6B	0.369786
OXSM	0.347805
P2RY5	0.436634
PAK1	-0.339912
PALB2	0.381501
PANK4	0.264117
PAPD4	0.372787
PAPPA	-0.453586
PAQR6	0.391438
PARL	-0.279472
PBX4	0.559039
PCDHB5	0.417276
PCF11	0.415751
PCGF6	0.571243
PCMTD2	0.551029
PCOLCE	-0.234824
PDCD5	0.369506
PDCD6IP	0.424463
PDE6D	-0.311296
PDHX	0.390008
PDLIM7	-0.288748
PDS5A	0.381848
PEX1	0.6369
PEX5	0.293255
PFKFB4	-0.300158
PFKM	-0.349255
PGM3	0.468467
PHF16	-0.404714
PHF20L1	0.492203
PHF5A	0.387881
PHF6	0.359908
PHIP	0.480278
PHLDB2	-0.620237
PHTF2	0.508722
PHYH	0.335391
PIGB	0.423613
PIGF	0.422766
PIK3C2B	-0.361317
PIK3R4	0.30742
PIP4K2A	-0.495566
PITPNA	-0.459672
PKM2	-0.45273
PLA2G6	0.355571
PLAC1	-0.485939
PLCD1	-0.362406
PLCG1	0.3378
PLD1	-0.527026
PLDN	0.310753
PLEKHA1	0.338691
PLEKHA6	0.60471
PLEKHF2	0.384692
PLK3	0.325003
PMS1	0.38921
PNN	0.358865
POLR2G	0.314997
POLR3GL	0.356265
POLS	0.225203
POP5	0.272664
POT1	0.277512
PPAPDC2	0.607849
PPARG	-0.682252
PPAT	0.43706
PPCS	0.303747
PPHLN1	0.401977
PPHLN1	0.475149
PPIF	-0.317637
PPIL3	0.425206
PPIL5	0.385773
PPP1R13B	0.297536
PPP1R16B	-0.352641
PPP2R5A	-0.562724
PRAF2	0.174018
PRC1	0.399895
PRDM8	0.473398
PRG2	0.472592
PRICKLE1	-0.512967
PRKAR2B	-0.626046
PRKDC	0.304076
PRND	-0.375971
PRY	-0.502063
PSEN1	-0.403867
PSG1	0.418284
PSG5	0.405204
PSMC6	0.926396
PSMD5	-0.313068
PSME4	0.286453
PSTK	0.694572
PTBP2	0.711582
PTDSS2	0.232393
PTPMT1	0.481134
PTPRC	0.735706
PUM2	0.279488
PURA	0.275533
PXT1	-0.3855
RAB18	0.470123
RAB22A	0.346754
RAB33B	0.548369
RAB38	-0.337497
RAB8B	-0.293023
RABGAP1	0.292859
RABGGTB	0.644469
RAD23B	0.473659
RAD51C	0.636746
RAD51C	0.535243
RAD54L2	0.324418
RAG1AP1	0.205727
RANBP6	0.402858
RAP2C	0.525698
RAPGEFL1	0.334724
RARRES2	0.226983
RARS2	0.598363
RASGEF1B	-0.302322
RB1CC1	0.375554
RBAK	0.581615
RBM15	0.459611
RBM17	0.346357
RBM25	0.424888
RBM45	0.486557
RCHY1	0.508503
RCN1	0.438547
RCN2	0.544881
RCOR1	0.27346
RCOR3	0.420274
RECK	0.504742
REG3G	-0.508283
REPIN1	0.38846
REV1	0.284584
RFC1	0.42429
RFC4	0.359687
RFX7	0.346801
Rgr	0.449658
RHBDF1	0.350083
RICTOR	0.628585
RIMS2	-0.406068
RINT1	0.415221
RIPK2	0.293301
RIPK5	0.322877
RMND1	0.39163
RNF121	0.422195
RNF126	0.454474
RNF133	-0.529897
RNF138	0.349711
RNF152	-0.545495
RNPC3	0.297882
ROBO4	0.362461
RPA3	0.480857
RPAP3	0.503086
RPL39L	0.757837
RPS6KA3	0.45066
RPS6KA6	-0.474884
RRAGB	0.447026
RSRC1	0.427469
RTTN	0.436823
RWDD2B	-0.513737
RWDD3	0.536019
RYR1	-0.43798
SAAL1	0.341429
SAPS2	-0.329799
SASH1	-0.450943
SCAPER	0.438561
SCG5	0.412215
SCN1B	-0.275005
SCOC	0.560303
SCYE1	0.358818
SCYL1	0.219825
SDC1	-0.462057
SEC11C	0.353945
SEC22A	0.498981
SEC23A	0.444589
SEC23IP	0.26213
SEC31A	-0.229221
SEC31B	0.284152
SENP7	0.573772
SEPHS1	0.341722
SERF1B	0.458879
SERINC2	0.506269
SERPINB11	-0.580212
SERPINB7	-0.497934
SFRS18	0.30424
SFRS5	0.467873
SFRS6	0.450448
SFXN2	0.343975
SGK2	0.445471
SGTA	-0.388692
SH3KBP1	-0.240194
SHMT2	0.547836
SHPRH	0.379135
SIGLEC11	-0.293793
SIRT3	0.323232
SIRT4	0.420634
SKI	-0.509065
SKP1	0.325061
SLC13A4	-0.354008
SLC25A15	0.336744
SLC25A20	0.463173
SLC25A31	-0.527842
SLC25A32	0.632132
SLC26A8	-0.312436
SLC26A8	-0.412103
SLC27A3	0.284994
SLC30A9	0.289477
SLC37A1	0.39811
SLC37A4	0.193684
SLC4A7	0.638135
SLC6A13	-0.408801
SLC7A6	0.269941
SLC9A3R1	-0.227509
SLC9A6	0.396229
SLFN12	0.723186
SLMO1	-0.458883
SLN	0.316503
SMARCAD1	-0.552933
SMARCB1	0.353848
SMC1B	-0.317133
SMC4	0.378708
SMNDC1	0.382324
SMPD2	0.239777
SMPX	0.498177
SNRPG	0.538222
SNX26	-0.427471
SNX27	-0.505713
SOCS1	-0.341092
SOCS5	-0.306777
SOCS6	0.491927
SON	0.246767
SORD	0.509169
SORL1	-0.57962
SOST	-0.362387
SOX10	-0.434011
SP110	-0.34732
SP2	-0.368996
SPANXN4	-0.430413
SPATA2	-0.490696
SPATA6	0.329896
SPEF2	-0.39674
SPG11	0.247058
SPIN2A	0.321925
SPIN4	0.691578
SPTBN4	0.282721
SREBF1	-0.277771
SRI	0.399293
SS18L1	0.581677
SS18L1	0.479919
ST3GAL6	0.716015
ST6GALNAC2	-0.415928
STAC3	-0.400205
STAG1	0.536628
STAG2	0.253374
STAM2	0.590551
STCH	0.269563
STEAP1	-0.557522
STK17B	0.663662
STK24	-0.21688
STK31	0.461945
STRN	-0.418638
STXBP3	0.42536
SUB1	0.517028
SUCNR1	-0.462578
SUMO1	0.326528
SUZ12	0.436864
SYNJ2BP	0.623928
TAAR8	-0.43915
TADA2L	0.414682
TAF1A	0.636246
TAF9B	0.506659
TARS2	0.3973
TAS2R14	-0.360761
TASP1	0.370403
TBC1D10C	0.264316
TBC1D23	0.613163
TBCE	0.379787
TBX2	0.453207
TCAP	0.262531
TCEAL7	0.289625
TEX10	0.397134
TFAP4	0.382283
TGFBR1	0.478134
TGM2	-0.399979
THEM2	0.261356
THOC7	0.262529
THUMPD2	0.304888
TIAM1	-0.377866
TIGD7	0.369871
TINF2	-0.170085
TIPIN	0.337537
TLK1	0.288312
TLR3	0.493923
TM9SF2	-0.240595
TMEFF1	-0.430977
TMEM1	0.435274
TMEM135	0.47972
TMEM149	0.237917
TMEM14A	0.373092
TMEM156	-0.348123
TMEM165	0.373013
TMEM187	0.285617
TMEM5	0.336642
TMEM53	-0.501083
TMEM54	0.456995
TMEM62	0.433405
TMEM67	-0.238819
TMEM85	0.369245
TMEM88	-0.379537
TMPRSS4	-0.372395
TMTC1	-0.325156
TNFRSF6B	-0.34343
TNK1	-0.363557
TNKS	-0.323938
TNP2	0.346552
TNPO1	0.53413
TOP1	-0.628673
TOX	0.477345
TOX4	0.316668
TP53INP2	-0.461859
TPD52L3	-0.481916
TPPP2	-0.442776
TPR	0.402033
TPRKB	0.436623
TRAT1	0.808863
TREX1	0.280356
TRIM15	0.514401
TRMT1	0.228885
TRMU	0.560309
TRPC1	0.650948
TRPM7	0.291809
TRPT1	0.314468
TTBK1	0.37791
TTBK2	-0.302871
TTC32	0.676937
TTC8	-0.601354
TTL	0.259725
TTLL5	0.265458
TTN	-0.423643
TTRAP	0.31729
TUBE1	0.508697
TULP4	0.378983
TXN	0.544024
TXNDC4	0.440178
TXNDC9	0.503371
UBA3	0.538615
UBAP2	-0.40165
UBE2D1	0.399986
UBE2Q2	0.41553
UBE2V1	0.485033
UBE2W	0.477549
UBTD2	-0.508987
UCP3	0.454504
UNQ9438	-0.461573
UPK2	-0.530363
USMG5	0.388274
USP1	0.395825
USP13	0.343099
USP16	0.353676
USP19	-0.259648
USP25	0.31446
UTP14A	0.557848
UTP6	0.334909
VAMP1	0.432054
VEZF1	0.216706
VPS4B	0.38569
VPS54	-0.442176
VRK1	0.458039
VSTM3	0.391212
VWCE	-0.566465
WAPAL	0.296132
WASL	0.478309
WBP2NL	0.320041
WBP4	0.420599
WBSCR19	0.331852
WDR11	0.416831
WDR3	0.393053
WDR3	0.302657
WDR33	0.563556
WDR47	0.410131
WDR52	-0.428259
WDR6	0.297659
WDR60	0.410626
WDR82	-0.448165
WDSOF1	0.404799
WHSC1	0.361059
WNT3	0.717059
WNT7B	0.294846
WWP1	0.240858
XAB1	0.254752
XPNPEP2	0.263921
XRN1	0.403727
YEATS4	-0.225956
YIPF6	0.384559
ZADH1	0.467257
ZAN	-0.327161
ZAP70	0.285584
ZBTB24	0.349985
ZBTB43	0.405005
ZC3H6	0.401945
ZCCHC11	0.403093
ZEB1	0.556722
ZFR	0.353462
ZHX1	0.403398
ZMAT1	0.732653
ZNF136	0.448516
ZNF14	0.485121
ZNF146	0.42742
ZNF155	0.385723
ZNF184	0.284561
ZNF189	0.348728
ZNF193	0.507615
ZNF195	0.596127
ZNF22	0.395019
ZNF223	0.327299
ZNF226	0.574275
ZNF234	0.615087
ZNF25	0.561349
ZNF280D	0.623225
ZNF292	0.681309
ZNF292	0.663992
ZNF294	0.553794
ZNF32	0.326847
ZNF333	-0.367978
ZNF335	0.304256
ZNF337	-0.320122
ZNF33A	0.352072
ZNF346	0.373838
ZNF350	0.43805
ZNF398	0.265317
ZNF420	0.609795
ZNF45	0.36432
ZNF451	0.423177
ZNF573	0.644004
ZNF576	-0.42915
ZNF627	0.347508
ZNF641	0.315726
ZNF649	-0.374257
ZNF668	0.458441
ZNF675	0.413849
ZNF7	0.354025
ZNF766	0.375102
ZNF77	0.498715
ZNF800	0.443016
ZPBP	-0.287927
ZRANB2	0.546566
ZSCAN5	-0.462059
ZWILCH	0.3107
